# Supplementary material
Source: PubMed Central journal article supplement (PMC9788061)
Supplement: ALZ-18-1846-s002.pdf [file ALZ-18-1846-s002.pdf]

# Table of Content

## Supplementary Figures

**Figure S1** CNV calling pipeline

**Figure S2** Illustration of the concept which compares the mean number of AD-specific CNVs per AD case with the mean number of MCI-specific CNVs per MCI case and the mean number of NL-specific CNVs per NL case

**Figure S3** Illustration of the concept of AD-CNV genes and genes overlapping with multiple AD-specific CNVs

**Figure S4** Super exact test on significantly CNV-correlated RNAs of five different brain regions in AD cases from the MSBB and ROSMAP cohorts

**Figure S5** DEG and Trait-correlation signal of CNV-correlated genes in five brain regions

**Figure S6** Kendall's tau-b correlation coefficient between CNVs and AD-related genes in five brain regions

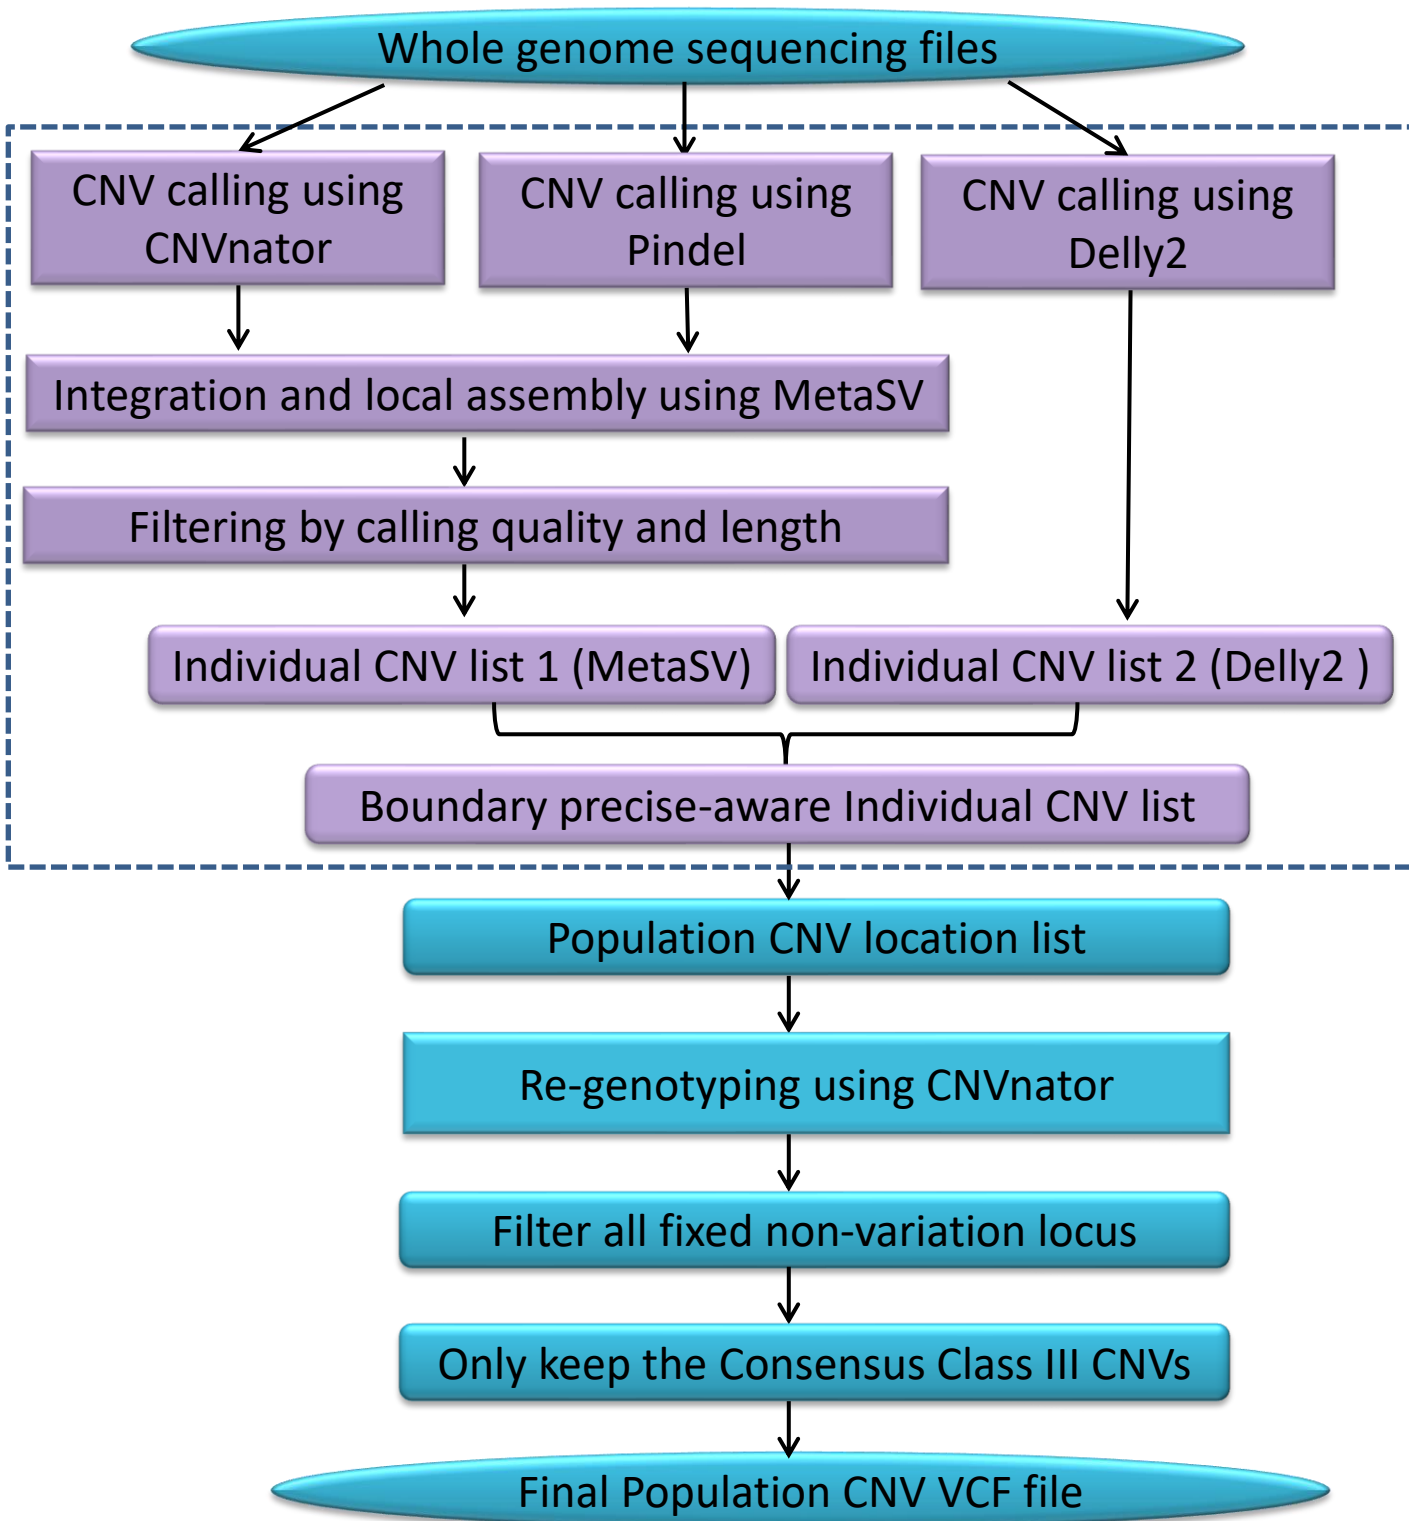

**Figure S1** CNV calling pipeline. Dash box contains CNV calling steps at individual level.

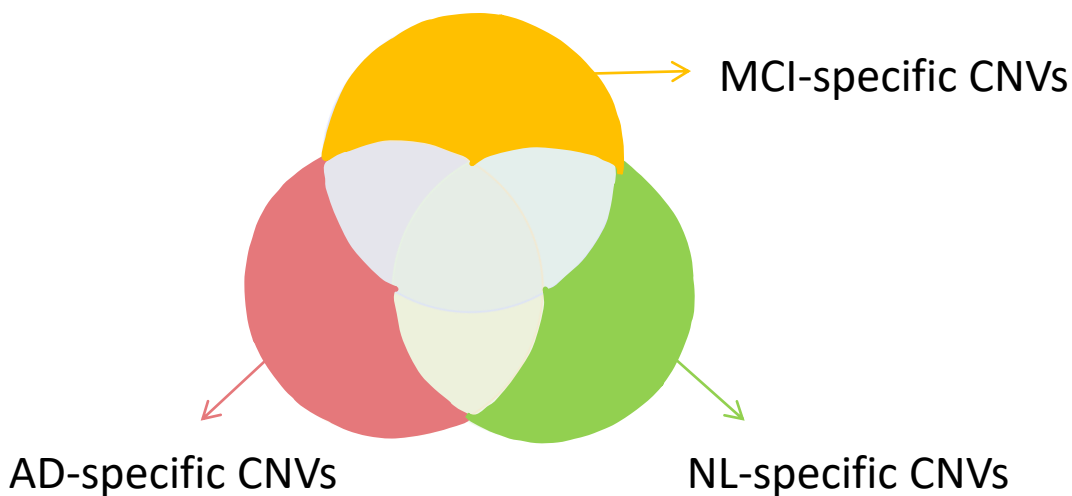

Null hypothesis:

the number of AD-specific CNVs per AD case  $\approx$  the number of MCI-specific CNVs per MCI case  
 $\approx$  the number of NL-specific CNVs per NL case

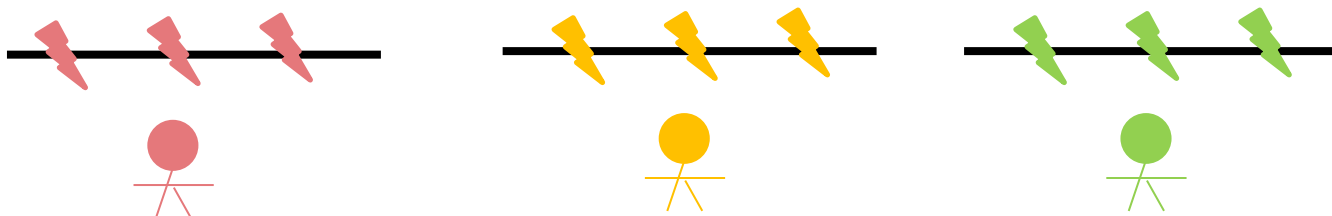

Our observation:

the number of AD-specific CNVs per AD case  $\gg$  the number of MCI-specific CNVs per MCI case  
 $\gg$  the number of NL-specific CNVs per NL case

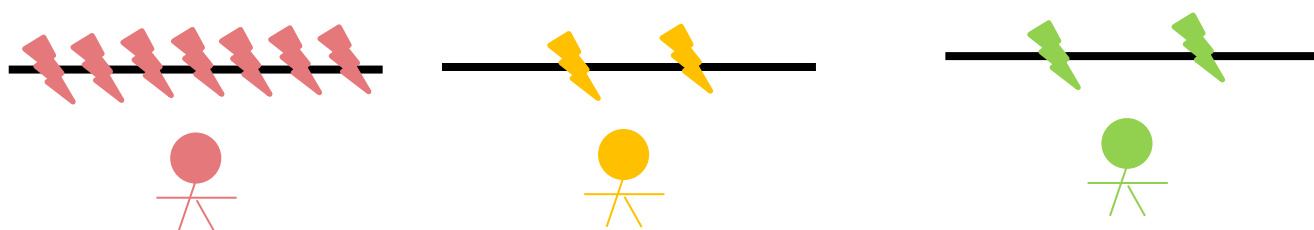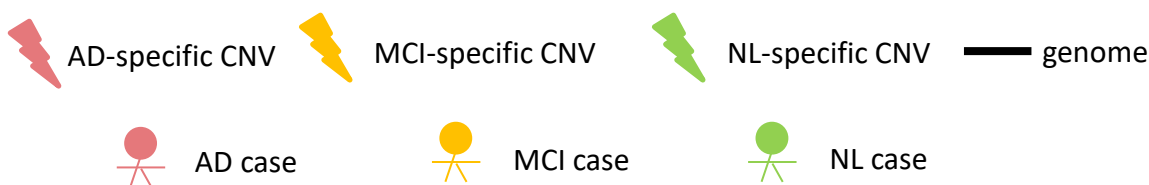

**Figure S2** Illustration of the concept which compares the mean number of AD-specific CNVs per AD case with the mean number of MCI-specific CNVs per MCI case and the mean number of NL-specific CNVs per NL case

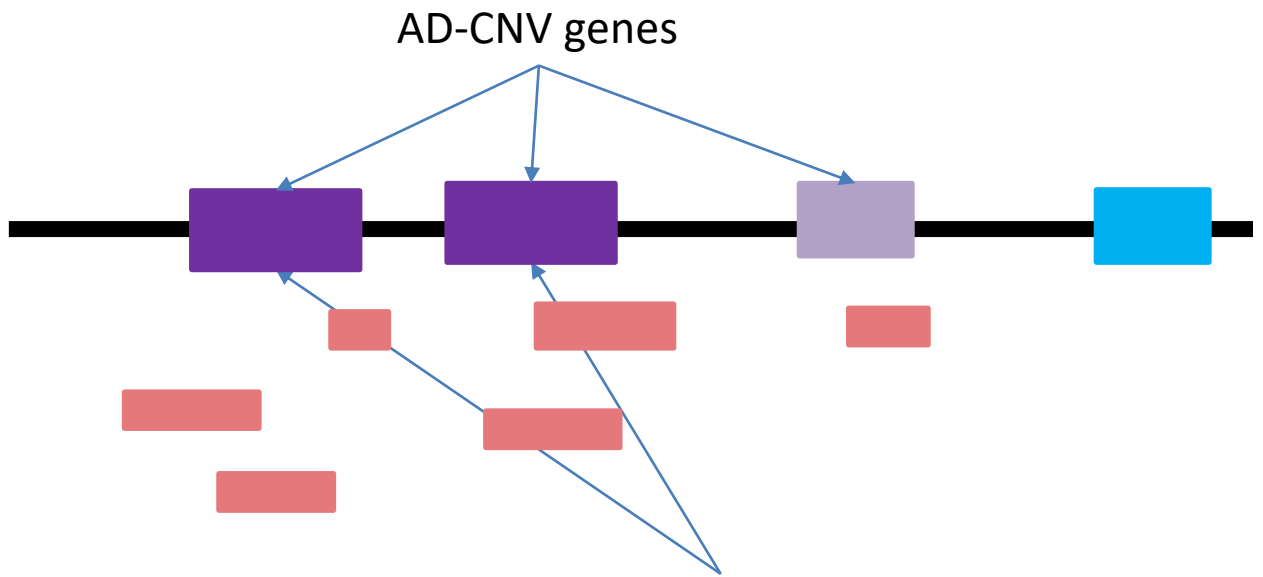

Gene overlapping with multiple AD-specific CNVs

- AD-specific CNV
- AD-CNV gene which overlaps with multiple AD-specific CNVs
- AD-CNV gene which overlaps with single AD-specific CNV
- Gene not overlapping with any AD-specific CNVs
- chromosome

**Figure S3** Illustration of the concept of AD-CNV genes and genes overlapping with multiple AD-specific CNVs

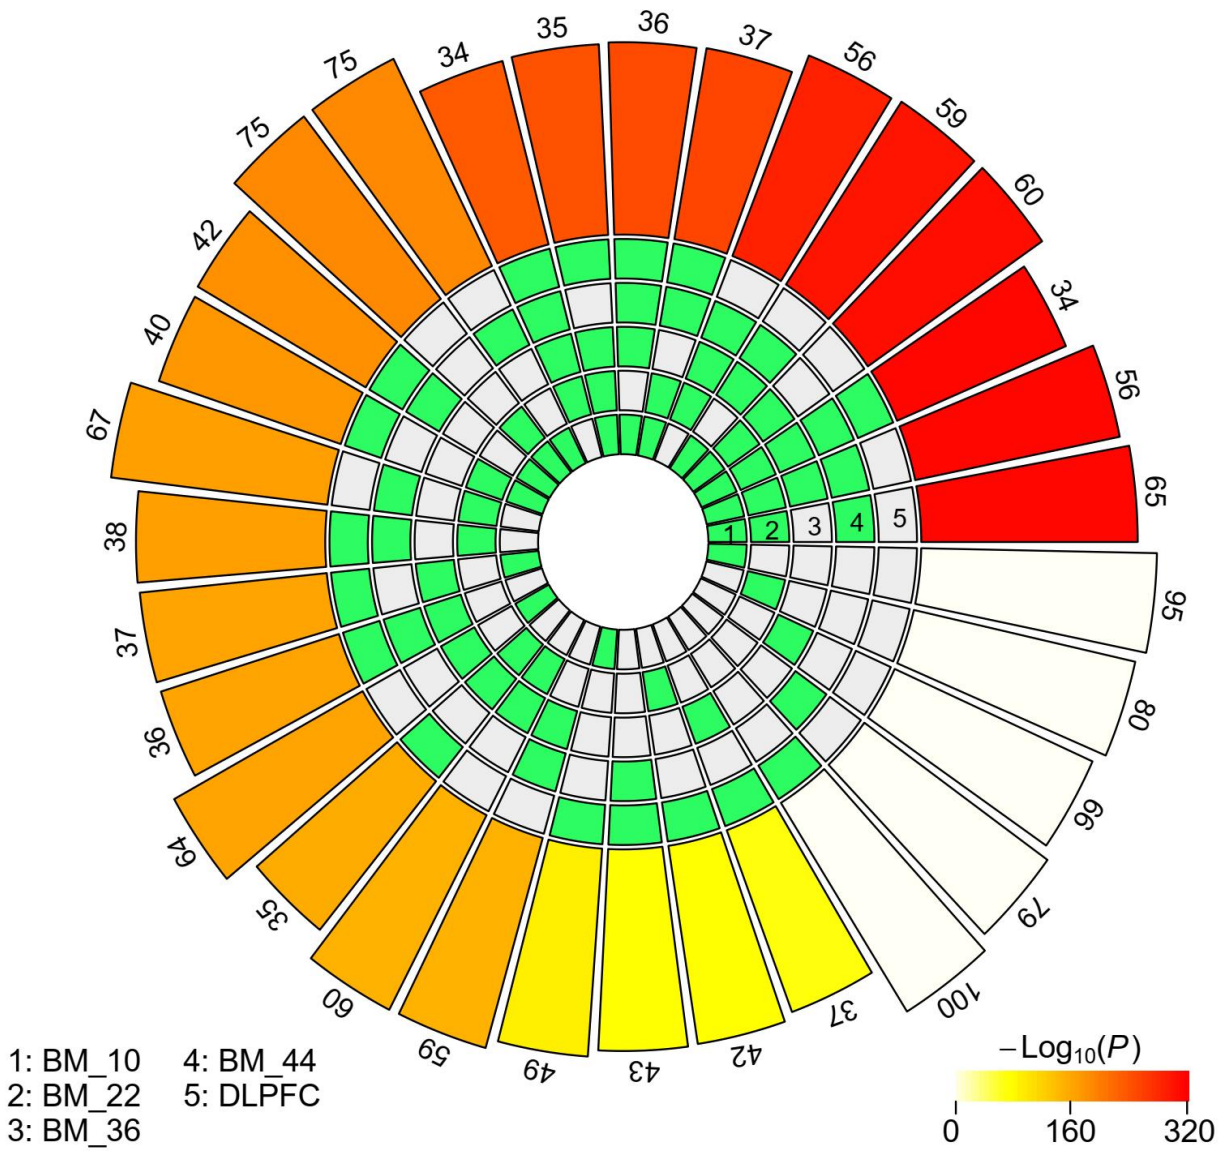

**Figure S4** Super exact test on significantly CNV-correlated RNAs of five different brain regions from the MSBB and ROSMAP cohorts

A

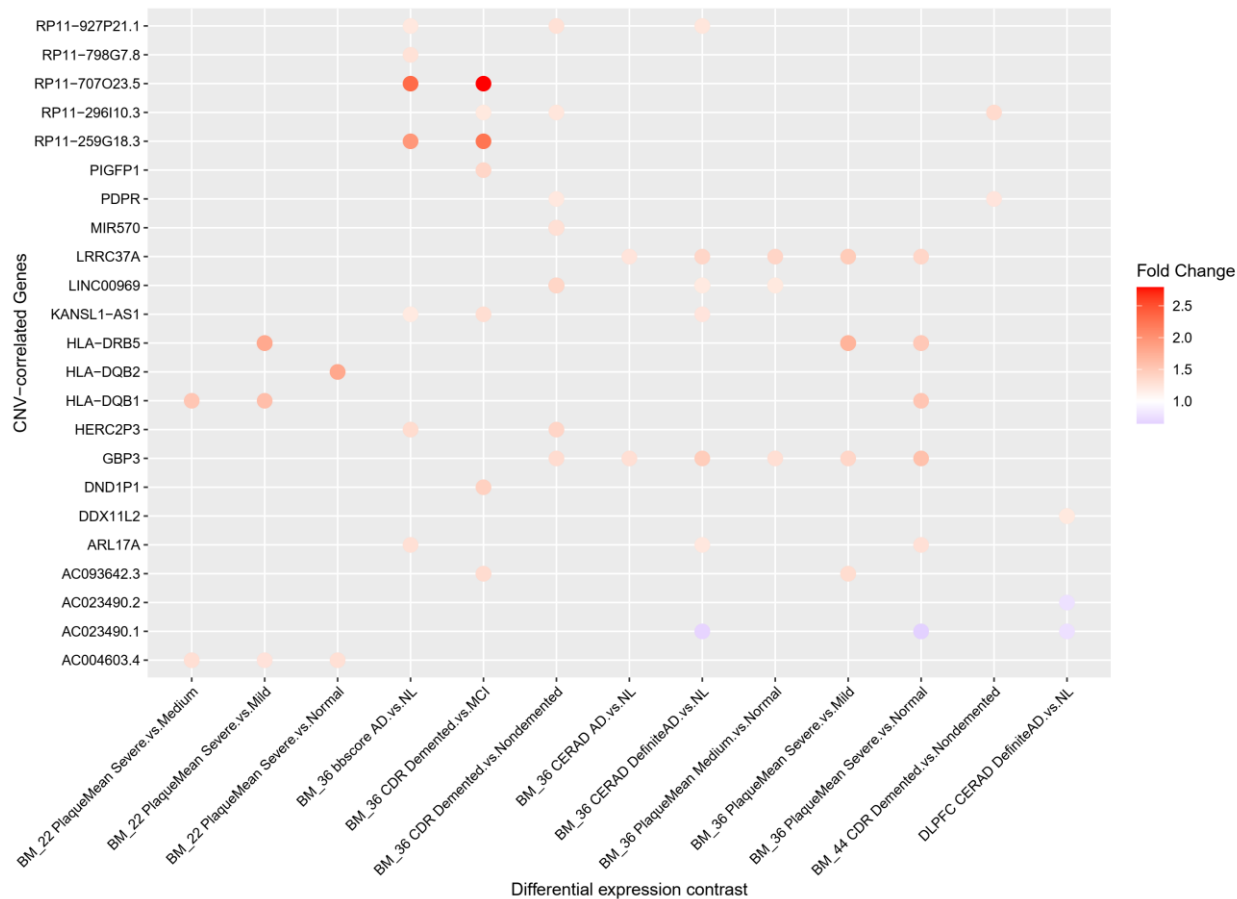

B

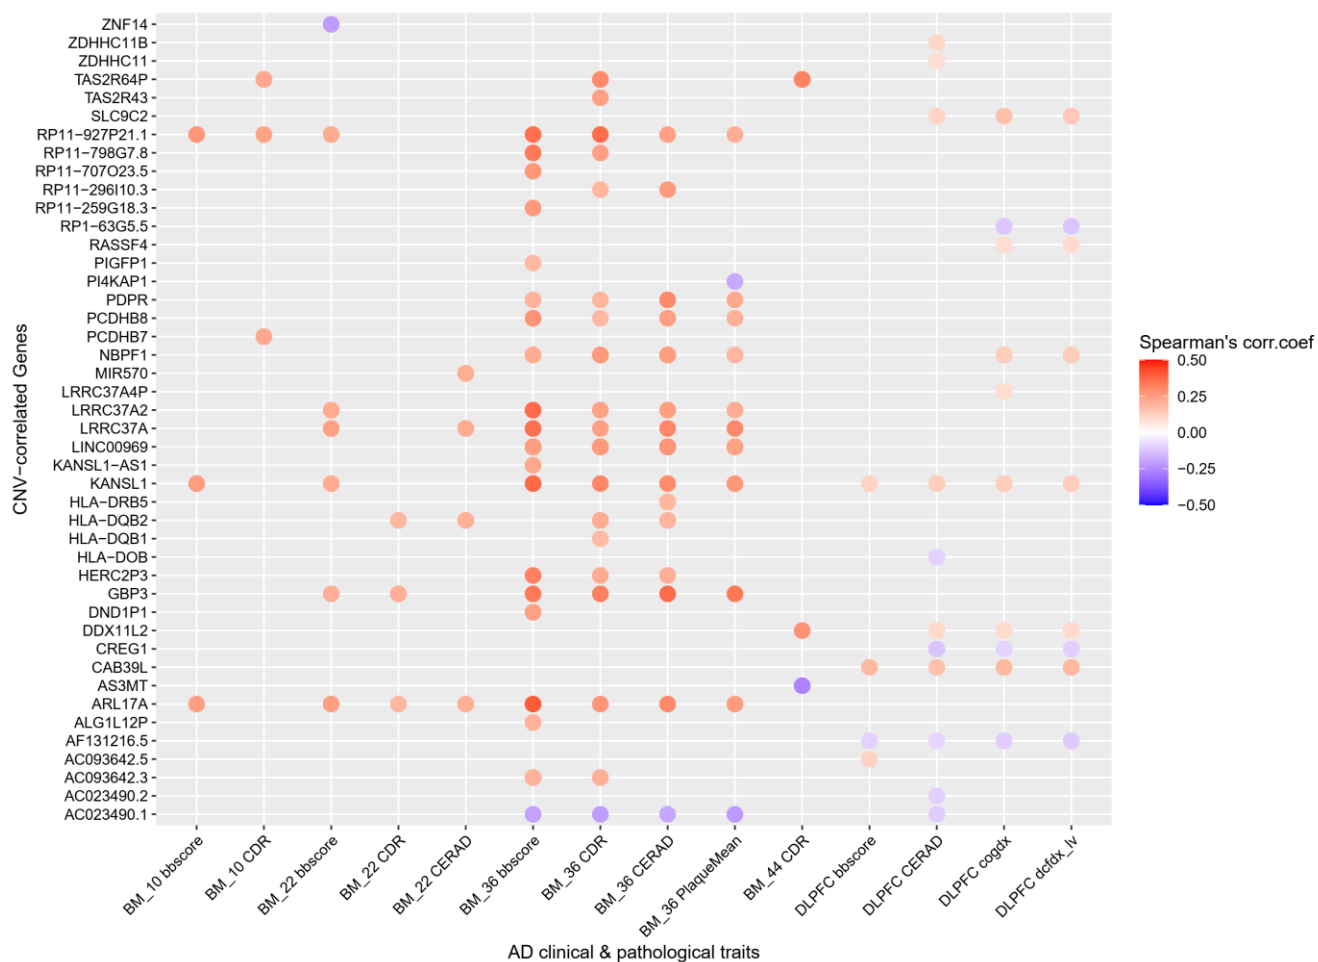

**Figure S5** DEG and Trait-correlation signal of CNV-correlated genes in five brain regions. A) DEG signal of CNV-correlated genes; B) AD trait-correlation signal of CNV-correlated genes

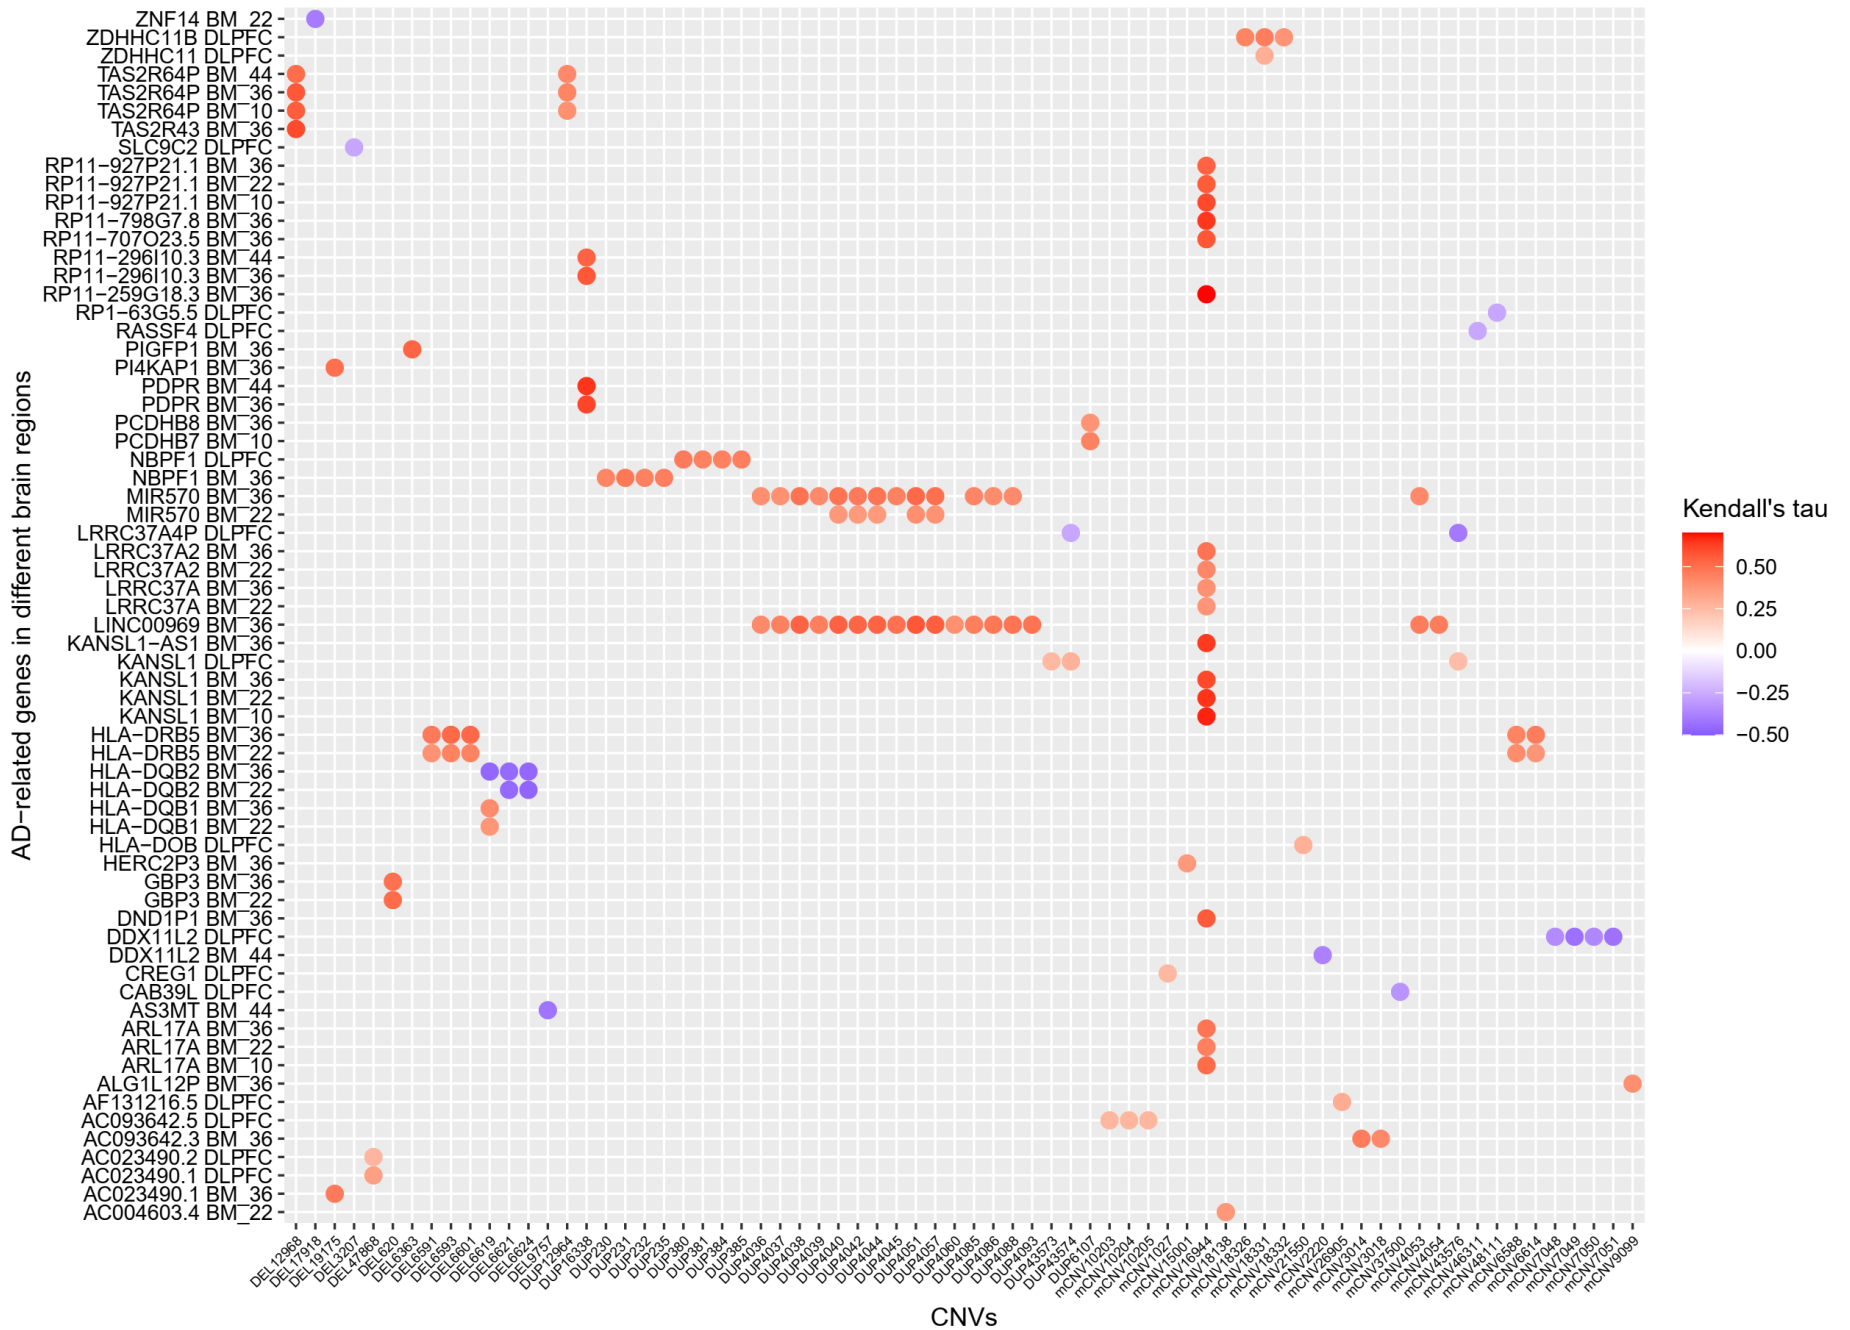

**Figure S6** Kendall's tau-b correlation coefficient between CNVs and AD-related genes in five brain regions
